# Supplementary material
Source: PubMed Central journal article supplement (PMC1691675)
Supplement: 15255043s01.pdf [file 15255043s01.pdf]

Electronic appendices are refereed with the text. However, no attempt is made to impose a uniform editorial style on the electronic appendices.

**Electronic Appendix A.** Taxonomic designation, colony abbreviation, geographic coordinates and sample size (n) for each sampling location.

| taxon              | geographic origin           | colony | co-ordinates      | n  | collected by                           |
|--------------------|-----------------------------|--------|-------------------|----|----------------------------------------|
| <i>argentatus</i>  | Norway, Tromsø              | argNN  | 69°40'N, 19°00'E  | 10 | R.R. Snell                             |
|                    | Germany, Hiddensee          | argDE  | 54°20'N, 13°10'E  | 9  | R. Barth, A.J. Helbig                  |
|                    | Finland, Lake Saimaa        | argFI  | 61°16'N, 28°15'E  | 7  | R. Juvaste                             |
|                    | Estonia, Matsalu            | argES  | 58°31'N, 24°10'E  | 10 | K. Rattiste                            |
|                    | Russia, Kandalaksha         | argWS  | 67°08'N, 32°32'E  | 5  | I. Charitonova, V. Bianki, M. Gulmakha |
|                    | Iceland, Skruður            | ageIC  | 65°00'N, 13°20'W  | 15 | R.R. Snell                             |
|                    | Denmark, Faeroe Island      | ageFA  | 62°20'N, 07°20'W  | 5  | J.K. Jensen, E. Fritze, R.R. Snell     |
|                    | France, Finistère           | ageFR  | 48°40'N, 03°20'W  | 10 | R.R. Snell                             |
|                    | Netherlands, Rotterdam      | ageNL  | 51°56'N, 04°28'E  | 8  | N.v. Swelm, P. de Knijff               |
|                    | Norway, Kristiansand        | ageSN  | 58°10'N, 06°40'E  | 11 | T.O. Hansen                            |
| <i>armenicus</i>   | Turkey, Tuz Gölü            | armTU  | 38°50'N, 33°10'E  | 5  | A.J. Helbig, D. Liebers                |
|                    | Turkey, Van Gölü            | armVA  | 38°20'N, 43°10'E  | 5  | A.J. Helbig, D. Liebers                |
| <i>atlantis</i>    | Portugal, Island of Madeira | atlMD  | 32°52'N, 17°10'W  | 5  | M.v. Leeuwen, N.v. Swelm               |
|                    | Portugal, Berlenga Island   | atlPO  | 39°25'N, 09°28'W  | 4  | M.v. Leeuwen, L. Moreis                |
| <i>barabensis</i>  | Morocco, Essaouira          | atIMO  | 31°30'N, 09°45'W  | 5  | M.v. Leeuwen, N.v. Swelm               |
|                    | Kazakhstan, Lake Tengiz     | barKZ  | 50°30'N, 69°30'E  | 10 | A.J. Helbig, D. Liebers                |
| <i>cachinnans</i>  | Romania, Danube Delta       | cacBS  | 44°30'N, 28°30'E  | 6  | R. Klein, A. Buchheim                  |
|                    | Ukraine, Odessa             | cacOD  | 46°20'N, 32°30'E  | 6  | A. Rudenko, N.v. Swelm                 |
| <i>dominicanus</i> | Ukraine, Azov' Black Sea    | cacAS  | 46°40'N, 35°20'E  | 4  | V. Dierschke, D. Liebers               |
|                    | Russia, N Caspian Sea       | cacCS  | 45°00'N, 48°20'E  | 10 | T. Tennhardt, D. Liebers               |
| <i>fuscus</i>      | Antarctic Peninsula         | domAN  | 62°11'S, 58°59'W  | 10 | J. Welcker, H.-U. Peter                |
|                    | Finland, Lake Saimaa        | fusFI  | 61°50'N, 28°50'E  | 17 | R. Juvaste, N.v. Swelm                 |
| <i>glaucescens</i> | USA, Gulf of Alaska         | glcAL  | 59°26'N, 146°19'W | 10 | D.A. Bell                              |
|                    | Canada, NWT, Baffin Island  | goINT  | 69°01'N, 68°00'W  | 7  | R.R. Snell                             |
| <i>glaucoides</i>  | Iceland, Reykjavik          | graIC  | 64°09'N, 21°57'W  | 9  | A. Sigfusson, R.R. Snell               |
|                    | Denmark, Faeroe Island      | graFA  | 62°20'N, 07°20'W  | 5  | J.K. Jensen, E. Fritze, R.R. Snell     |
| <i>graellsii</i>   | England, Stockport          | graUK  | 53°25'N, 02°10'W  | 7  | P. Stuart, N.v. Swelm                  |
|                    | Netherlands, Rotterdam      | granL  | 51°55'N, 04°28'E  | 9  | N.v. Swelm, F. Cottaar, K. Verbeek     |
| <i>heuglini</i>    | Russia, Kanin-Peninsula     | heuKA  | 67°40'N, 44°10'E  | 10 | P. Mierauskas                          |

| <b>taxon</b>         | <b>geographic origin</b>     | <b>colony</b> | <b>co-ordinates</b> | <b>n</b> | <b>collected by</b>              |
|----------------------|------------------------------|---------------|---------------------|----------|----------------------------------|
| <i>hyperboreus</i>   | Canada, NWT, Baffin Island   | hypNT         | 69°00'N, 68°00'W    | 10       | R.R. Snell                       |
|                      | Iceland, Bjarnjarhafnarfjall | hypIC         | 65°00'N, 23°00'W    | 10       | R.R. Snell                       |
|                      | Svalbard, Longyearbyen       | hypSP         | 78°13'N, 15°20'E    | 10       | R.R. Snell                       |
|                      | Russia, Novaja Semija        | hypSI         | 70°40'N, 54°32'E    | 10       | A. Filchagov, V. Kalyakin        |
| <i>intermedius</i>   | Norway, Vest-Agder           | intNO         | 58°20'N, 06°40'E    | 11       | T.O. Hansen                      |
| <i>marinus</i>       | Denmark, Faeroe Island       | marFA         | 62°20'N, 07°20'W    | 9        | J.K. Jensen                      |
| <i>michahellis</i>   | Spain, Galicia, La Coruña    | micGA         | 43°30'N, 08°50'W    | 5        | A. Bermejo                       |
|                      | Spain, Gibraltar             | micGI         | 36°08'N, 05°21'W    | 7        | M.v. Leeuwen, N.v. Swelm         |
|                      | France, Strasbourg, Alsace   | micFR         | 48°10'N, 08°00'W    | 4        | M. Boschert                      |
|                      | Italy, Capraia Island        | micIT         | 43°03'N, 09°48'W    | 4        | N. Baccetti                      |
|                      | Malta, Fiffia Island         | micMA         | 35°57'N, 14°26'W    | 4        | J. Sultana, C. Gauci, F. Cottaar |
|                      | Greece, Island of Crete      | micKR         | 35°10'N, 25°50'W    | 4        | A.J. Helbig                      |
|                      | Romania, Constanta           | micRU         | 44°10'N, 28°37'W    | 4        | R. Klein, A. Buchheim            |
| <i>mongolicus</i>    | Mongolia, Chowd, Char Nuur   | monWE         | 47°50'N, 92°20'E    | 5        | A. Bräunlich, O. Munhtogtoh      |
|                      | Mongolia, Tchojbaisan        | monEA         | 48°00'N, 114°30'E   | 5        | A. Bräunlich, O. Munhtogtoh      |
| <i>occidentalis</i>  | USA, San Francisco Bay       | occca         | 37°44'N, 122°22'W   | 6        | D.A. Bell                        |
| <i>schistsagus</i>   | Russia, Magadan              | schMG         | 59°33'N, 151°26'E   | 10       | O. Butorina, S. Andeev           |
| <i>smithsonianus</i> | USA, Alaska, Fairbanks       | smIAL         | 64°50'N, 147°10'W   | 5        | R.R. Snell                       |
|                      | Canada, NWT, Yellowknife     | smINT         | 62°40'N, 113°20'W   | 4        | J. Sirois                        |
|                      | Canada, ONT, Lake Huron      | smION         | 45°16'N, 80°15'W    | 10       | C. Weseloh, D. Liebers           |
|                      | Canada, NBW, Kent Island     | smINB         | 47°51'N, 64°33'W    | 9        | R.R. Snell                       |
|                      | Canada, Prince Edward Isl.   | smIPE         | 46°10'N, 63°30'W    | 10       | R.R. Snell                       |
| <i>taimyrensis</i>   | Russia, Taimyr-Peninsula     | taITA         | 74°10'N, 86°30'E    | 11       | C. Unger, D. Liebers             |
| <i>vegae</i>         | Russia, Tchukotka, Anadyr    | vegTC         | 64°32'N, 176°49'E   | 9        | O. Butorina                      |

**Electronic Appendix B.** Variable nucleotide positions and accession numbers of the 160 concatenated haplotypes identified in this study (note that there is no haplotype no. 71). Dots indicate identity with reference sequence (first line). The reference sequence is identical to haplotype no. 138.

**Cytochrome-b-Gene (70 variable sites)**

| ref. | 111111122  | 23333333334 | 4444445555 | 5556666777 | 7777888888  | 8899999000  | 0000000111  | 111        | 1111111111 |
|------|------------|-------------|------------|------------|-------------|-------------|-------------|------------|------------|
| #001 | 11111122   | 23333333334 | 4444445555 | 5556666777 | 7777888888  | 8899999000  | 0000000111  | 111        | 1111111111 |
| #002 | 2935667916 | 9004568990  | 2244891245 | 7890112234 | 55792334677 | 99033369022 | 24566678133 | 2233567778 | 8899900001 |
| #003 | 4903251994 | 1798431030  | 0948923532 | 9586254426 | 7910820703  | 1856900823  | 9792905034  | 3467541341 | 2588912672 |
| #004 | TCAAGCCGCA | ATCACCTAAT  | CTCCAAGACC | TCTCAATATA | GTTGAGTAAC  | ACTGGTTAGT  | CCAGTTTTTT  | ATAGTCCGTT | TTTCTAAGTT |
| #005 | .....GTT   | .....T      | .....T     | .....T     | .....T      | .....A      | .....C      | .....A     | .....C     |
| #006 | .....T     | .....G      | .....T     | .....T     | .....T      | .....G      | .....C      | .....A     | .....C     |
| #007 | .....T     | .....T      | .....T     | .....T     | .....T      | .....A      | .....C      | .....A     | .....C     |
| #008 | .....T     | .....T      | .....T     | .....T     | .....T      | .....A      | .....C      | .....A     | .....C     |
| #009 | .....T     | .....T      | .....G     | .....G     | .....G      | .....G      | .....G      | .....G     | .....G     |
| #010 | .....T     | .....T      | .....G     | .....G     | .....G      | .....G      | .....G      | .....G     | .....G     |
| #011 | .....TT    | .....C      | .....T     | .....T     | .....T      | .....C      | .....C      | .....A     | .....T     |
| #012 | .....TT    | .....C      | .....T     | .....T     | .....T      | .....C      | .....C      | .....A     | .....T     |
| #013 | .....TT    | .....C      | .....T     | .....T     | .....T      | .....C      | .....C      | .....A     | .....T     |
| #014 | .....TT    | .....C      | .....T     | .....T     | .....T      | .....A      | .....C      | .....A     | .....T     |
| #015 | .....T     | .....T      | .....T     | .....T     | .....T      | .....A      | .....C      | .....A     | .....T     |
| #016 | .....T     | .....T      | .....G     | .....G     | .....G      | .....G      | .....G      | .....G     | .....G     |
| #017 | .....GTT   | .....T      | .....T     | .....T     | .....T      | .....A      | .....C      | .....A     | .....T     |
| #018 | .....GTT   | .....T      | .....T     | .....T     | .....T      | .....A      | .....C      | .....A     | .....T     |
| #019 | .....GTT   | .....T      | .....T     | .....T     | .....T      | .....A      | .....C      | .....A     | .....T     |
| #020 | .....T     | .....T      | .....T     | .....T     | .....T      | .....A      | .....C      | .....A     | .....T     |
| #021 | .....T     | .....T      | .....T     | .....T     | .....T      | .....A      | .....C      | .....A     | .....T     |
| #022 | .....TT    | .....C      | .....T     | .....T     | .....T      | .....A      | .....C      | .....A     | .....T     |
| #023 | .....TT    | .....C      | .....T     | .....T     | .....T      | .....A      | .....C      | .....A     | .....T     |
| #024 | .....TT    | .....C      | .....T     | .....T     | .....T      | .....A      | .....C      | .....A     | .....T     |
| #025 | .....TT    | .....C      | .....T     | .....T     | .....T      | .....A      | .....C      | .....A     | .....T     |
| #026 | .....GTT   | .....T      | .....G     | .....G     | .....G      | .....G      | .....G      | .....G     | .....G     |
| #027 | .....GTT   | .....T      | .....T     | .....T     | .....T      | .....A      | .....C      | .....A     | .....T     |
| #028 | .....TT    | .....T      | .....T     | .....T     | .....T      | .....A      | .....C      | .....A     | .....T     |
| #029 | .....TT    | .....T      | .....T     | .....T     | .....T      | .....A      | .....C      | .....A     | .....T     |
| #030 | .....TT    | .....T      | .....T     | .....T     | .....T      | .....A      | .....C      | .....A     | .....T     |
| #031 | .....TT    | .....T      | .....T     | .....T     | .....T      | .....A      | .....C      | .....A     | .....T     |
| #032 | .....TT    | .....T      | .....T     | .....T     | .....T      | .....A      | .....C      | .....A     | .....T     |
| #033 | .....TT    | .....T      | .....T     | .....T     | .....T      | .....A      | .....C      | .....A     | .....T     |
| #034 | .....T     | .....T      | .....T     | .....T     | .....T      | .....A      | .....C      | .....A     | .....T     |
| #035 | .....T     | .....T      | .....T     | .....T     | .....T      | .....A      | .....C      | .....A     | .....T     |
| #036 | .....T     | .....T      | .....T     | .....T     | .....T      | .....A      | .....C      | .....A     | .....T     |
| #037 | .....T     | .....T      | .....T     | .....T     | .....T      | .....A      | .....C      | .....A     | .....T     |
| #038 | .....T     | .....T      | .....T     | .....T     | .....T      | .....A      | .....C      | .....A     | .....T     |
| #039 | .....T     | .....T      | .....T     | .....T     | .....T      | .....A      | .....C      | .....A     | .....T     |
| #040 | .....T     | .....T      | .....T     | .....T     | .....T      | .....A      | .....C      | .....A     | .....T     |
| #041 | .....T     | .....T      | .....G     | .....G     | .....G      | .....G      | .....G      | .....G     | .....G     |
| #042 | .....T     | .....T      | .....G     | .....G     | .....G      | .....G      | .....G      | .....G     | .....G     |
| #043 | .....T     | .....T      | .....T     | .....T     | .....T      | .....A      | .....C      | .....A     | .....T     |

**HVR-I region (46 variable sites)**

| ref. | 111111     | 11111111111 | 12222222222 | 2222333    |
|------|------------|-------------|-------------|------------|
| #001 | 111111     | 11111111111 | 12222222222 | 2222333    |
| #002 | 2233567778 | 8899900001  | 1112334588  | 9112244448 |
| #003 | 3467541341 | 2588912672  | 3481023002  | 6781412495 |
| #004 | ATAGTCCGTT | TTTCTAAGTT  | CCCGCTGGTA  | TGCTCTTCCA |
| #005 | .....A     | .....C      | .....T      | .....ATA   |
| #006 | .....A     | .....C      | .....T      | .....ATA   |
| #007 | .....A     | .....C      | .....T      | .....ATA   |
| #008 | .....A     | .....C      | .....T      | .....ATA   |
| #009 | .....A     | .....C      | .....T      | .....ATA   |
| #010 | .....A     | .....C      | .....T      | .....ATA   |
| #011 | .....A     | .....C      | .....T      | .....ATA   |
| #012 | .....A     | .....C      | .....T      | .....ATA   |
| #013 | .....A     | .....C      | .....T      | .....ATA   |
| #014 | .....A     | .....C      | .....T      | .....ATA   |
| #015 | .....A     | .....C      | .....T      | .....ATA   |
| #016 | .....A     | .....C      | .....T      | .....ATA   |
| #017 | .....A     | .....C      | .....T      | .....ATA   |
| #018 | .....A     | .....C      | .....T      | .....ATA   |
| #019 | .....A     | .....C      | .....T      | .....ATA   |
| #020 | .....A     | .....C      | .....T      | .....ATA   |
| #021 | .....A     | .....C      | .....T      | .....ATA   |
| #022 | .....A     | .....C      | .....T      | .....ATA   |
| #023 | .....A     | .....C      | .....T      | .....ATA   |
| #024 | .....A     | .....C      | .....T      | .....ATA   |
| #025 | .....A     | .....C      | .....T      | .....ATA   |
| #026 | .....A     | .....C      | .....T      | .....ATA   |
| #027 | .....A     | .....C      | .....T      | .....ATA   |
| #028 | .....A     | .....C      | .....T      | .....ATA   |
| #029 | .....A     | .....C      | .....T      | .....ATA   |
| #030 | .....A     | .....C      | .....T      | .....ATA   |
| #031 | .....A     | .....C      | .....T      | .....ATA   |
| #032 | .....A     | .....C      | .....T      | .....ATA   |
| #033 | .....A     | .....C      | .....T      | .....ATA   |
| #034 | .....A     | .....C      | .....T      | .....ATA   |
| #035 | .....A     | .....C      | .....T      | .....ATA   |
| #036 | .....A     | .....C      | .....T      | .....ATA   |
| #037 | .....A     | .....C      | .....T      | .....ATA   |
| #038 | .....A     | .....C      | .....T      | .....ATA   |
| #039 | .....A     | .....C      | .....T      | .....ATA   |
| #040 | .....A     | .....C      | .....T      | .....ATA   |
| #041 | .....A     | .....C      | .....T      | .....ATA   |
| #042 | .....A     | .....C      | .....T      | .....ATA   |
| #043 | .....A     | .....C      | .....T      | .....ATA   |

Acc. no. Cyt-b  
 Acc. no. HVR-I



Elec. App. B (cont'd)

Cytochrome-b-Gene (70 variable sites)

HVR-I region (46 variable sites)

| ref. | 11111122   | 23333333   | 44444555   | 55566677   | 77788888   | 88999900   | 00000011   | 11111111   | 11111111   | 12222222   | 222333     | Acc-No   | Acc-No |
|------|------------|------------|------------|------------|------------|------------|------------|------------|------------|------------|------------|----------|--------|
|      | 2935667916 | 9004568990 | 2244891245 | 7890112234 | 5579234677 | 9903369022 | 2456678133 | 3467541341 | 2588912672 | 3481023002 | 6781412495 | 134550   | HVR-I  |
|      | TCAGACCGCA | ATCACCTAAT | CTCCAAGACC | TCTCAATATA | GTTGAGTAAC | ACTGGTTAGT | CCAGTTTTTT | ATAGTCCGTT | TTTCTAAGTT | CCCGCTGGTA | TGCTCTTCCA | CGAGGA   |        |
| #090 | ...TT...   | ...T...    | ...T...    | ...G...    | ...G...    | ...C...    | ...C...    | ...T.A...  | C..C.G..   | ..A.....   | .....G...  | AJ508101 |        |
| #091 | ...T.G...  | ...G.....  | ...G.....  | ...A.....  | ...A.A...  | AJ508309 |        |
| #092 | ...T.G...  | ...G.....  | ...G.....  | ...A.....  | ...A.A...  | AJ507817 |        |
| #094 | ...T.G...  | ...G.....  | ...G.....  | ...A.....  | ...A.A...  | AJ507818 |        |
| #095 | ...T.G...  | ...G.....  | ...G.....  | ...A.....  | ...A.A...  | AJ508109 |        |
| #096 | ...T.G...  | ...G.....  | ...G.....  | ...A.....  | ...A.A...  | AJ508107 |        |
| #097 | ...T.G...  | ...G.....  | ...G.....  | ...A.....  | ...A.A...  | AJ508133 |        |
| #098 | ...T.G...  | ...G.....  | ...G.....  | ...A.....  | ...A.A...  | AJ508133 |        |
| #099 | ...T.G...  | ...G.....  | ...G.....  | ...A.....  | ...A.A...  | AJ508134 |        |
| #100 | ...T.G...  | ...G.....  | ...G.....  | ...A.....  | ...A.A...  | AJ508148 |        |
| #101 | ...T.G...  | ...G.....  | ...G.....  | ...A.....  | ...A.A...  | AJ508326 |        |
| #102 | ...T.G...  | ...G.....  | ...G.....  | ...A.....  | ...A.A...  | AJ508327 |        |
| #103 | ...T.G...  | ...G.....  | ...G.....  | ...A.....  | ...A.A...  | AJ508328 |        |
| #104 | ...T.G...  | ...G.....  | ...G.....  | ...A.....  | ...A.A...  | AJ508148 |        |
| #105 | ...T.G...  | ...G.....  | ...G.....  | ...A.....  | ...A.A...  | AJ508148 |        |
| #106 | ...T.G...  | ...G.....  | ...G.....  | ...A.....  | ...A.A...  | AJ508148 |        |
| #107 | ...T.G...  | ...G.....  | ...G.....  | ...A.....  | ...A.A...  | AJ508148 |        |
| #108 | ...TT...   | ...G.....  | ...G.....  | ...A.....  | ...A.A...  | AJ508148 |        |
| #109 | ...TT...   | ...G.....  | ...G.....  | ...A.....  | ...A.A...  | AJ508148 |        |
| #110 | ...TT...   | ...G.....  | ...G.....  | ...A.....  | ...A.A...  | AJ508148 |        |
| #111 | ...TT...   | ...G.....  | ...G.....  | ...A.....  | ...A.A...  | AJ508148 |        |
| #112 | ...TT...   | ...G.....  | ...G.....  | ...A.....  | ...A.A...  | AJ508148 |        |
| #113 | ...TT...   | ...G.....  | ...G.....  | ...A.....  | ...A.A...  | AJ508148 |        |
| #114 | ...TT...   | ...G.....  | ...G.....  | ...A.....  | ...A.A...  | AJ508148 |        |
| #115 | ...TT...   | ...G.....  | ...G.....  | ...A.....  | ...A.A...  | AJ508148 |        |
| #116 | ...TT...   | ...G.....  | ...G.....  | ...A.....  | ...A.A...  | AJ508148 |        |
| #117 | ...TT...   | ...G.....  | ...G.....  | ...A.....  | ...A.A...  | AJ508148 |        |
| #118 | ...TT...   | ...G.....  | ...G.....  | ...A.....  | ...A.A...  | AJ508148 |        |
| #119 | ...TT...   | ...G.....  | ...G.....  | ...A.....  | ...A.A...  | AJ508148 |        |
| #120 | ...TT...   | ...G.....  | ...G.....  | ...A.....  | ...A.A...  | AJ508148 |        |
| #121 | ...TT...   | ...G.....  | ...G.....  | ...A.....  | ...A.A...  | AJ508148 |        |
| #122 | ...TT...   | ...G.....  | ...G.....  | ...A.....  | ...A.A...  | AJ508148 |        |
| #123 | ...TT...   | ...G.....  | ...G.....  | ...A.....  | ...A.A...  | AJ508148 |        |
| #124 | ...TT...   | ...G.....  | ...G.....  | ...A.....  | ...A.A...  | AJ508148 |        |
| #125 | ...TT...   | ...G.....  | ...G.....  | ...A.....  | ...A.A...  | AJ508148 |        |
| #126 | ...TT...   | ...G.....  | ...G.....  | ...A.....  | ...A.A...  | AJ508148 |        |
| #127 | ...TT...   | ...G.....  | ...G.....  | ...A.....  | ...A.A...  | AJ508148 |        |
| #128 | ...TT...   | ...G.....  | ...G.....  | ...A.....  | ...A.A...  | AJ508148 |        |
| #129 | ...TT...   | ...G.....  | ...G.....  | ...A.....  | ...A.A...  | AJ508148 |        |
| #130 | ...TT...   | ...G.....  | ...G.....  | ...A.....  | ...A.A...  | AJ508148 |        |
| #131 | ...TT...   | ...G.....  | ...G.....  | ...A.....  | ...A.A...  | AJ508148 |        |
| #132 | ...TT...   | ...G.....  | ...G.....  | ...A.....  | ...A.A...  | AJ508148 |        |
| #133 | ...TT...   | ...G.....  | ...G.....  | ...A.....  | ...A.A...  | AJ508148 |        |
| #134 | ...TT...   | ...G.....  | ...G.....  | ...A.....  | ...A.A...  | AJ508122 |        |

Elec. App. B (cont'd)

Cytochrome-b-Gene (70 variable sites)

HVR-I region (46 variable sites)

| ref. | 11111122    | 23333333   | 44444455   | 55566677   | 77778888   | 88999900   | 11111111   | 11111111   | 11111111   | 12222222   | 222233     | Acc-No | Acc-No   |          |
|------|-------------|------------|------------|------------|------------|------------|------------|------------|------------|------------|------------|--------|----------|----------|
|      | 9004568990  | 1798431030 | 0948923532 | 9586254426 | 7910820703 | 1856900823 | 9792905034 | 2588912672 | 3481023002 | 6781412495 | 134550     | Cyt-b  | HVR-I    |          |
| #135 | TCAGACCCGCA | ATCACCTAAT | CTCCAAGACC | TCTCAATATA | GTTGAGTAAC | ACTGGTTAGT | CCAGTTTTTT | ATAGTCCGTT | TTTCTAAGTT | CCCGCTGGTA | TGCTCTTCCA | CGAGGA | AJ508093 | AJ508325 |
| #136 | .....       | .....      | .....      | .....      | .....      | .....      | .....      | .AG...TA.  | C...C.G.   | .....      | .....      | .G.    | AJ508091 | AJ276947 |
| #137 | .....       | .....      | .....      | .....      | .....      | .....      | .....      | .....      | .....      | .....      | .....      | .....  | AJ508111 | AJ507739 |
| #138 | .....       | .....      | .....      | .....      | .....      | .....      | .....      | .....      | .....      | .....      | .....      | .....  | AJ508111 | AJ277127 |
| #139 | .....       | .....      | .....      | .....      | .....      | .....      | .....      | .....      | .....      | .....      | .....      | .....  | AJ508130 | AJ277128 |
| #140 | .....       | .....      | .....      | .....      | .....      | .....      | .....      | .....      | .....      | .....      | .....      | .....  | AJ507743 | AJ507743 |
| #141 | .....       | .....      | .....      | .....      | .....      | .....      | .....      | .....      | .....      | .....      | .....      | .....  | AJ507740 | AJ507740 |
| #142 | .....       | .....      | .....      | .....      | .....      | .....      | .....      | .....      | .....      | .....      | .....      | .....  | AJ507810 | AJ507810 |
| #143 | .....       | .....      | .....      | .....      | .....      | .....      | .....      | .....      | .....      | .....      | .....      | .....  | AJ507812 | AJ507812 |
| #144 | .....       | .....      | .....      | .....      | .....      | .....      | .....      | .....      | .....      | .....      | .....      | .....  | AJ507811 | AJ277128 |
| #145 | .....       | .....      | .....      | .....      | .....      | .....      | .....      | .....      | .....      | .....      | .....      | .....  | AJ277128 | AJ277128 |
| #146 | .....       | .....      | .....      | .....      | .....      | .....      | .....      | .....      | .....      | .....      | .....      | .....  | AJ508125 | AJ277128 |
| #147 | .....       | .....      | .....      | .....      | .....      | .....      | .....      | .....      | .....      | .....      | .....      | .....  | AJ508099 | AJ276950 |
| #148 | .....       | .....      | .....      | .....      | .....      | .....      | .....      | .....      | .....      | .....      | .....      | .....  | AJ508093 | AJ276950 |
| #149 | .....       | .....      | .....      | .....      | .....      | .....      | .....      | .....      | .....      | .....      | .....      | .....  | AJ508141 | AJ277132 |
| #150 | .....       | .....      | .....      | .....      | .....      | .....      | .....      | .....      | .....      | .....      | .....      | .....  | AJ508143 | AJ507762 |
| #151 | .....       | .....      | .....      | .....      | .....      | .....      | .....      | .....      | .....      | .....      | .....      | .....  | AJ507737 | AJ507737 |
| #152 | .....       | .....      | .....      | .....      | .....      | .....      | .....      | .....      | .....      | .....      | .....      | .....  | AJ276941 | AJ276941 |
| #153 | .....       | .....      | .....      | .....      | .....      | .....      | .....      | .....      | .....      | .....      | .....      | .....  | AJ277127 | AJ277127 |
| #154 | .....       | .....      | .....      | .....      | .....      | .....      | .....      | .....      | .....      | .....      | .....      | .....  | AJ508128 | AJ277127 |
| #155 | .....       | .....      | .....      | .....      | .....      | .....      | .....      | .....      | .....      | .....      | .....      | .....  | AJ508128 | AJ507744 |
| #156 | .....       | .....      | .....      | .....      | .....      | .....      | .....      | .....      | .....      | .....      | .....      | .....  | AJ508128 | AJ507737 |
| #157 | .....       | .....      | .....      | .....      | .....      | .....      | .....      | .....      | .....      | .....      | .....      | .....  | AJ508121 | AJ508330 |
| #158 | .....       | .....      | .....      | .....      | .....      | .....      | .....      | .....      | .....      | .....      | .....      | .....  | AJ508121 | AJ508331 |
| #159 | .....       | .....      | .....      | .....      | .....      | .....      | .....      | .....      | .....      | .....      | .....      | .....  | AJ508121 | AJ508332 |
| #160 | .....       | .....      | .....      | .....      | .....      | .....      | .....      | .....      | .....      | .....      | .....      | .....  | AJ508121 | AJ508333 |
| #161 | .....       | .....      | .....      | .....      | .....      | .....      | .....      | .....      | .....      | .....      | .....      | .....  | AJ508121 | AJ508334 |









**Electronic Appendix D.** Results of nested clade analysis (two-step clades and higher) on 53 geographically defined populations of the herring gull complex.

| Clade number | Chi-square analysis p-value | inference        | conclusion                                             |
|--------------|-----------------------------|------------------|--------------------------------------------------------|
| 2.02         | 0.025                       | 1y2n11y12n       | contiguous range expansion                             |
| 2.06         | <0.001                      | 1y2y3y5n6?7y     | restricted gene flow with some long distance dispersal |
| 2.17         | 0.001                       | 1y2y3n4y9y10y    | allopatric fragmentation                               |
| 2.19         | <0.001                      | 1y2y3n4n         | restricted gene flow with isolation by distance        |
| 3.01         | 0.015                       | 1y2y3n4n         | restricted gene flow with isolation by distance        |
| 3.02         | <0.001                      | 1y2n11y12y13y    | long distance colonization                             |
| 3.03         | <0.001                      | 1y2n11y12n       | contiguous range expansion                             |
| 3.05         | <0.001                      | 1y2n11y12n       | contiguous range expansion                             |
| 3.06         | <0.001                      | 1y2n11y12y13n14y | long distance colonization                             |
| 3.08         | <0.001                      | 1y2y3n4n         | restricted gene flow with isolation by distance        |
| 4.01         | <0.001                      | 1y2y3n4n         | restricted gene flow with isolation by distance        |
| 4.02         | <0.001                      | 1y2n11y12n       | contiguous range expansion                             |
| 4.03         | <0.001                      | 1y2n11y12n       | contiguous range expansion                             |
| 5.01         | <0.001                      | 1y2n11y12n       | contiguous range expansion                             |
| 5.02         | <0.001                      | 1y2n11y12n       | contiguous range expansion                             |
| 6.01         | <0.001                      | 1y2y3y5y15y16y   | allopatric fragmentation                               |

The nested clade design is shown in figure 4 of the main paper. Results are presented here only for clades for which the null hypothesis of no association between geography and the haplotype tree could be rejected at the 5% level of significance. Interpretation of the results is based on the inference key of 24 October 2001 ([http://biog.byu.edu/zooology/crandell\\_lab/geodis.htm](http://biog.byu.edu/zooology/crandell_lab/geodis.htm)).
